# Supplementary material
Source: PubMed Central journal article supplement (PMC3665055)
Supplement: NIHMS462506-supplement-2_si_001.pdf [file NIHMS462506-supplement-2_si_001.pdf]

## SUPPORTING INFORMATION

For manuscript:

Small Molecule Screen Reveals Regulation of Survival Motor Neuron Protein  
Abundance by Ras Proteins

Reka R. Letso<sup>1</sup>, Andras J. Bauer<sup>1</sup>, Mitchell R. Lunn<sup>1</sup>, Wan Seok Yang<sup>1</sup> and Brent R.  
Stockwell<sup>1,2,\*</sup>

<sup>1</sup>Howard Hughes Medical Institute, Department of Biological Sciences and <sup>2</sup>Department  
of Chemistry, Columbia University, Fairchild Center, MC 2406, 1212 Amsterdam  
Avenue, New York, NY 10027

\*Correspondence: [bstockwell@columbia.edu](mailto:bstockwell@columbia.edu)

SUPPLEMENTAL TABLES

**Supplemental Table S1.**

| Descriptor                   | Weight   |
|------------------------------|----------|
| Number of Rotatable bonds    | 0.343453 |
| No. Nitrogen atoms           | 0.478301 |
| logP                         | 0.142011 |
| Molecular refractivity       | 0.41457  |
| VDW.SURF. AREA+0             | 1        |
| VDW.SURF. AREA+1             | 0.467561 |
| VDW.SURF. AREA+2             | 0.337016 |
| VDW.SURF. AREA+3             | 0.579149 |
| VDW.SURF. AREA+4             | 0.356697 |
| VDW.SURF. AREA+5             | 0.176136 |
| VDW.SURF. AREA+6             | 0.233498 |
| VDW.SURF. AREA-0             | 0.787855 |
| VDW.SURF. AREA-1             | 0.76905  |
| VDW.SURF. AREA-2             | 0.191082 |
| VDW.SURF. AREA-3             | 0.208545 |
| VDW.SURF. AREA-4             | 0.092401 |
| VDW.SURF. AREA-5             | 0.107985 |
| VDW.SURF. AREA-6             | 0.03543  |
| logP_VDW.SURF. AREA WEIGHED1 | 0.106565 |
| logP_VDW.SURF. AREA WEIGHED2 | 0.149196 |
| logP_VDW.SURF. AREA WEIGHED4 | 0.073578 |
| logP_VDW.SURF. AREA WEIGHED5 | 0.460146 |
| logP_VDW.SURF. AREA WEIGHED6 | 0.055342 |
| logP_VDW.SURF. AREA WEIGHED7 | 0.381712 |
| logP_VDW.SURF. AREA WEIGHED8 | 0.314164 |
| logP_VDW.SURF. AREA WEIGHED9 | 0.41783  |
| SMR_VDW.SURF. AREA WEIGHED0  | 0.134093 |
| SMR_VDW.SURF. AREA WEIGHED1  | 0.277358 |
| SMR_VDW.SURF. AREA WEIGHED5  | 0.25668  |
| SMR_VDW.SURF. AREA WEIGHED6  | 0.255068 |

**Supplemental Table S2.**

| <b>Library</b> | <b>No. of cmpds</b> | <b>Hitpicked</b> | <b>Tested by WB</b> | <b>Confirmed by WB</b> |
|----------------|---------------------|------------------|---------------------|------------------------|
| TIC            | 23,686              | 595              | 82                  | 2                      |
| ACL            | 2,337               | 5                | 1                   | 0                      |
| NINDS          | 1,040               | 36               | 2                   | 0                      |
| CGX            | 20,000              | 296              | 0                   | 0                      |
| BBC            | 4,621               | 49               | 3                   | 0                      |
| BBL            | 5,240               | 31               | 7                   | 0                      |
| BBA            | 12,265              | 94               | 10                  | 1                      |
| <b>Total</b>   | <b>69,189</b>       | <b>1,106</b>     | <b>105</b>          | <b>3</b>               |

**Supplemental Table S3.**

| <b>Cell Line</b> | <b>Cell Line Origin</b>         | <b>SMN Increase (%)</b> | <b>SD</b>    |
|------------------|---------------------------------|-------------------------|--------------|
| <i>Human</i>     |                                 | <i>by Western blot</i>  | <i>n ≥ 2</i> |
| 232              | Fibroblast, SMA patient type I  | 29%                     | 15%          |
| 3813             | Fibroblast, SMA patient type I  | 71%                     | 18%          |
| 9677             | Fibroblast, SMA patient type I  | 93%                     | 24%          |
| 3814             | Fibroblast, SMA carrier         | 73%                     | 38%          |
| 10684            | Lymphoblast, SMA patient type I | 18%                     | 11%          |
| SMA ESC-MN       | ESC-derived MN, SMA             | 27%                     | 3%           |
| ESC-MN           | ESC-derived MN, WT              | - 1%                    | 8%           |
| HT1080           | Fibrosarcoma                    | 32%                     | 14%          |
| 293T             | Embryonic kidney                | 10%                     | 6%           |
| A549             | Lung carcinoma                  | 21%                     | 7%           |
| <i>Rodent</i>    |                                 |                         |              |
| WT MEF           | Embryonic fibroblast, mouse     | 2%                      | 18%          |
| PC12             | Pheochromocytoma, rat           | - 8%                    | 2%           |
| ST14A            | Striatal cells, rat             | 0%                      | 15%          |
| mESC-MN          | ESC-derived MN, WT mouse        | - 21%                   | 13%          |

## SUPPLEMENTAL LEGENDS

### **Supplemental Table S1. List of descriptors used for *in silico* calculations**

### **Supplemental Table S2. Summary of screening data**

### **Supplemental Table S3. Genotype-specificity testing of cuspin-1**

Table lists designations and origins of each cell line, as well as the mean percent increase of SMN protein levels normalized to actin compared to DMSO-only control after treatment with 5 $\mu$ g/ml (18 $\mu$ M) cuspin-1 for two days, as quantified by Western blot. Standard deviation (SD) for each value is shown in the following column.

### **Supplemental Figure S1. Validation of *in silico* screening filters for selection of compounds for the BBB libraries**

Correlation between experimentally determined logBB values and predicted values of the training set (A) and the validation set (B).

### **Supplemental Figure S2. SMN-upregulating activity of hit compounds c72 and c81**

Graph of relative luminescence (RLU) from dose-response in cytoblot assay quantifying the amount of SMN upregulation by compound 72 (A) and compound 81 (B). To the right of each dose curve is the structure of the active compound and a representative Western blot of #9677 SMA patient fibroblast cells treated with 5 $\mu$ g/ml (12.5 $\mu$ M for c72, 14.6 $\mu$ M for c81) for 2 days. Fold increase of SMN to actin ratio, normalized to control is quantified below each lane.

### **Supplemental Figure S3. <sup>1</sup>H NMR of cuspin-1**

<sup>1</sup>H NMR of cuspin-1 confirming the structure. <sup>1</sup>H NMR (CDCl<sub>3</sub>, 400MHz) 8.89 (t, *J* = 2.2 Hz, 2H), 8.25 (t, *J* = 2.0 Hz, 1H), 7.74 (d, *J* = 8.2 Hz, 2H), 7.35 (d, *J* = 8.0 Hz, 2H), 2.49 (s, 3H).

### SUPPLEMENTAL METHODS

#### **Preparation of Compound Libraries for Primary Screening**

Compound libraries were either obtained at a concentration of 4 mg/mL in dimethyl sulfoxide (DMSO) or were solubilized in DMSO and plated at this concentration in 384-well, clear, polypropylene, 13mm deep "mother" plates (Greiner/#781280). These stocks were diluted into media to create "daughter" plates as follows: 148 μL of Dulbecco's Modified Eagle's Medium (Invitrogen/#11995-040) were dispensed using a Biomek FX into each well of a 384-well, clear, polypropylene, 22mm deep daughter plate (Greiner/#781270). Two μL from the mother plate were transferred to the daughter plates and thoroughly mixed using a Beckman Biomek FX workstation. This resulted in a compound concentration of 53.33 μg/mL in each well of the daughter plates.

#### **Cytoblot Cell Seeding into 384-Well Plates and Primary Compound Screening**

GM03813 cells (herein referred to as “#3813”), GM09677 cells (“#9677”), and GM00232 cells (“#232”) were trypsinized, centrifuged at 214g (1000rpm with 19.2cm rotor radius) for five minutes and resuspended in culture media at a concentration of 420,000 cells/mL. Thirty-six  $\mu$ L of cell suspension were dispensed into each well of a 384-well, opaque bottom, white, tissue culture-treated, 13mm deep assay plate (Perkin Elmer/#6007680) using a Biomek FX, for a concentration of 15,000 cells/well. Four  $\mu$ L from the daughter plate was transferred to each assay plate using a Biomek FX, resulting in a final compound concentration of 5.33  $\mu$ g/mL per well. The plate was covered with the supplied lid and incubated at 37°C and 5% carbon dioxide for 48 hours. All compounds were tested in triplicate.

### **Cytoblot Fixation, Permeabilization and Antibody Staining**

After 48 hours incubation with small molecules, the growth medium was aspirated out of each assay plate, and 30  $\mu$ L of ice cold (-20°C) methanol was added to each well for fixation and permeabilization using a Biomek FX. The plates were incubated for 5 minutes on ice, after which the methanol was aspirated and the primary antibody solution was immediately added. Twenty  $\mu$ L of 10% (v/v) goat serum (Invitrogen/#16210-072) in PBS with 0.1% Tween® 20 (Aldrich/#274348) containing primary antibody (see below for dilutions) was dispensed to each well using a Biomek FX. Plates were sealed using a Velocity11 PlateLoc and incubated overnight at 4°C. The following day, the seals were removed and the primary antibody solution was aspirated out of each assay plate. Twenty  $\mu$ L of secondary antibody in the same blocking buffer was dispensed into each well using

a Biomek FX. Plates were incubated for one hour at room temperature prior to signal detection. HRP SMN cyto blot: mouse anti-SMN (BD Transduction Laboratories/#610647) (1:3,000 dilution) and goat anti-mouse-HRP (Santa Cruz Biotechnology/#sc-2031) (1:9,000 dilution)

### **Cyto blot Signal Detection**

After the one hour incubation period, the secondary antibody solution was aspirated out of each assay plate. Fifty  $\mu\text{L}$  of 10% (v/v) goat serum in PBS with 0.1% Tween® 20 were added to each well using a Biomek FX, to rinse out unbound secondary antibody. After 10 minute incubation on ice, the solution was aspirated. Twenty  $\mu\text{L}$  of enhanced chemiluminescence (ECL) reagent were added to each well using a Biomek FX. ECL reagent is composed of two solutions mixed together immediately prior to use – Solution A: 5 mL Tris (pH 8.5) (Roche/#0604205) and 4  $\mu\text{L}$   $\text{H}_2\text{O}_2$  (Sigma/#H1009); Solution B: 5 mL Tris (pH 8.5) (Roche/#0604205), 22  $\mu\text{L}$  90 mM coumaric acid (Sigma/#C9008), and 50  $\mu\text{L}$  250 mM luminol (Fluka/#09253). Luminescence was read using a Perkin Elmer Victor 3 microtiter platereader (#1420-041) equipped with an infrared filter, using a 0.8 s integration time per well. Data was exported and evaluated in Excel.

### **Dose-response experiments**

Compounds showing activity in the primary screen were retested in dilution series, daughter plates of the hit-containing mother plates were recreated (as described above). For the “step-daughter” plates, fifty-eight  $\mu\text{L}$  of DMEM (as diluent) were dispensed using a Biomek FX into every well (except for columns 8 and 15) of an empty, 384-well, clear, polypropylene, 22mm deep plate (Greiner/#781270). One hundred and sixteen (116)  $\mu\text{L}$  of hit compound in media (53.33 $\mu\text{g}/\text{ml}$ ) were transferred using the Span-8 head of a Biomek FX from the daughter plate to the step-daughter plate. Picked hits were dispensed in columns 8 and 15 using rows C through N (one well per compound), allowing 24 hits per step-daughter plate. A two-fold, six-point serial dilution was performed by the Biomek FX Span-8 head: compounds in column 8 were diluted through column 13, and compounds in column 15 were diluted through column 20. All compounds were tested in triplicate.

### **Robotic Scripts and Settings**

BioMek FX (software version 2.5e) method files are available upon request.
