# Supplementary material
Source: PubMed Central journal article supplement (PMC3665055)

A

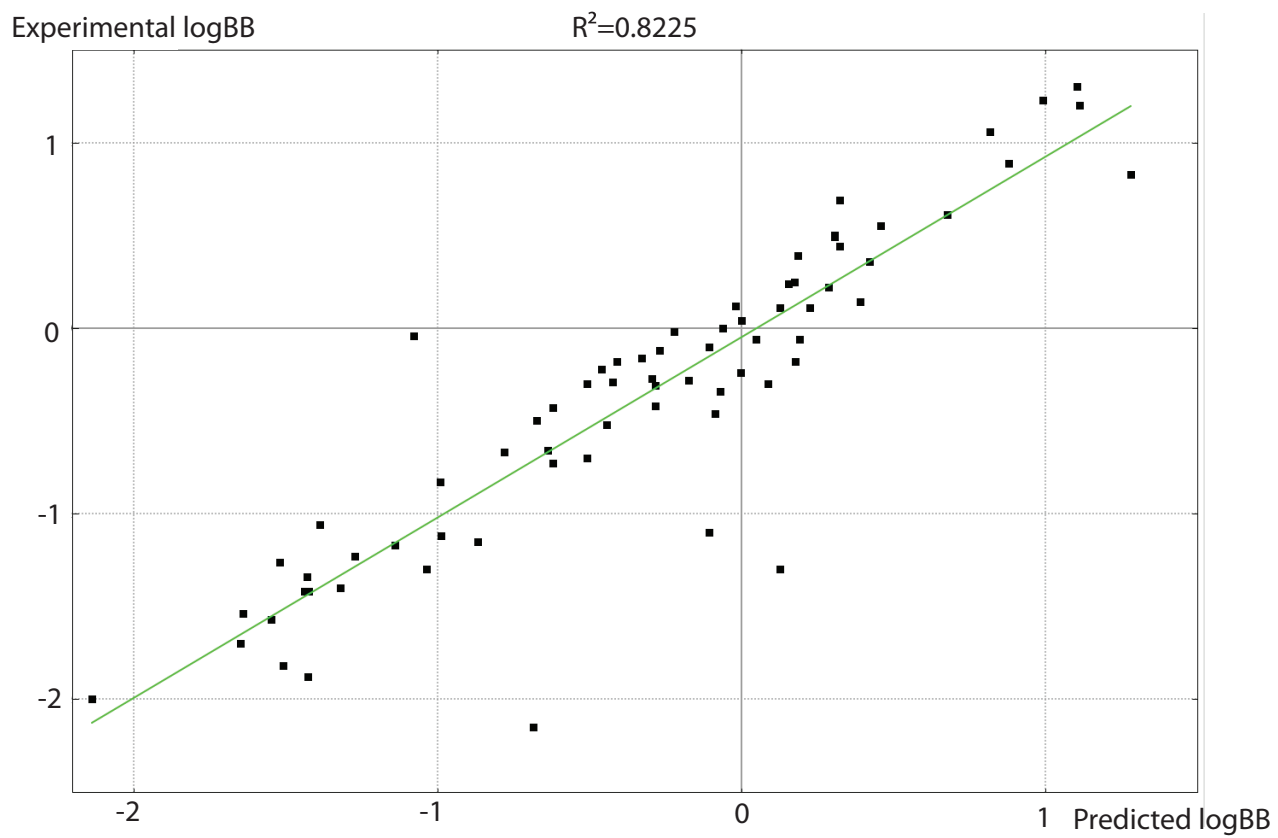

B

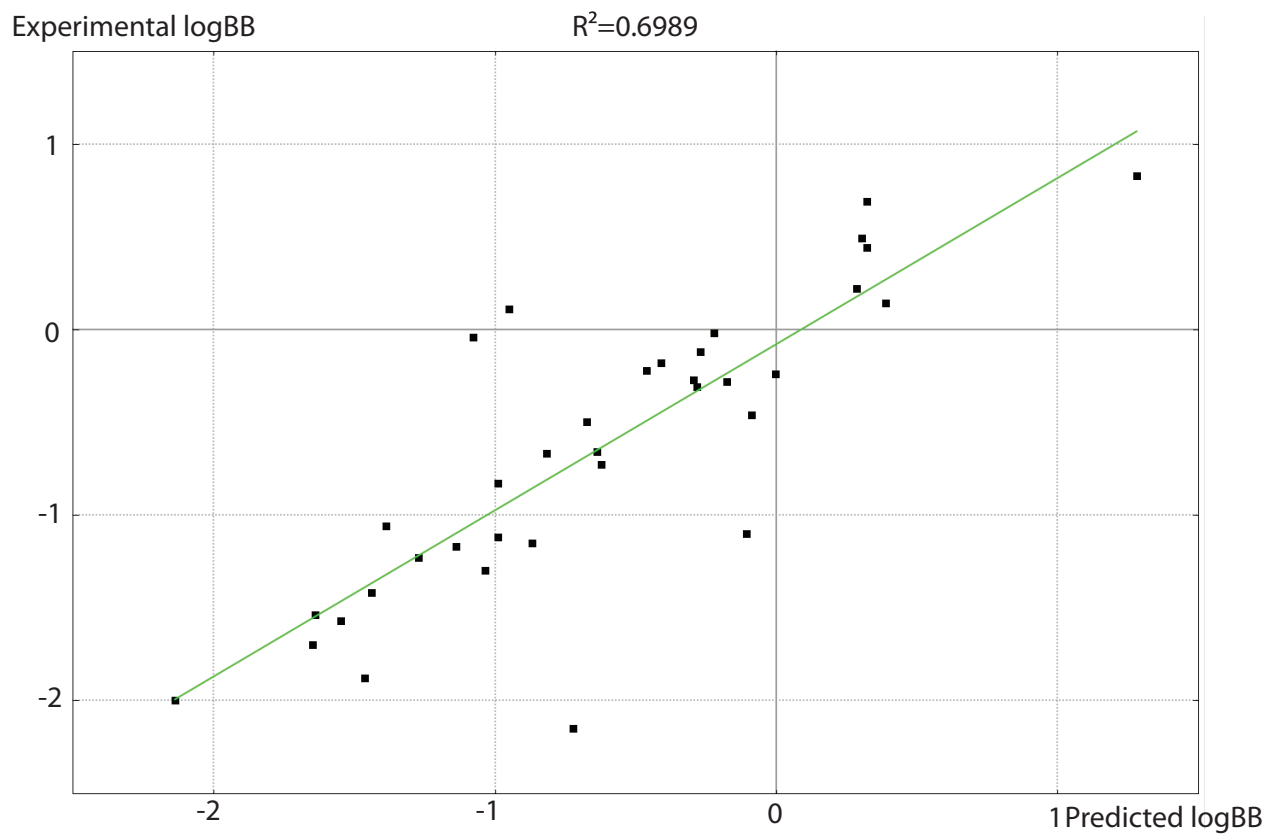

A

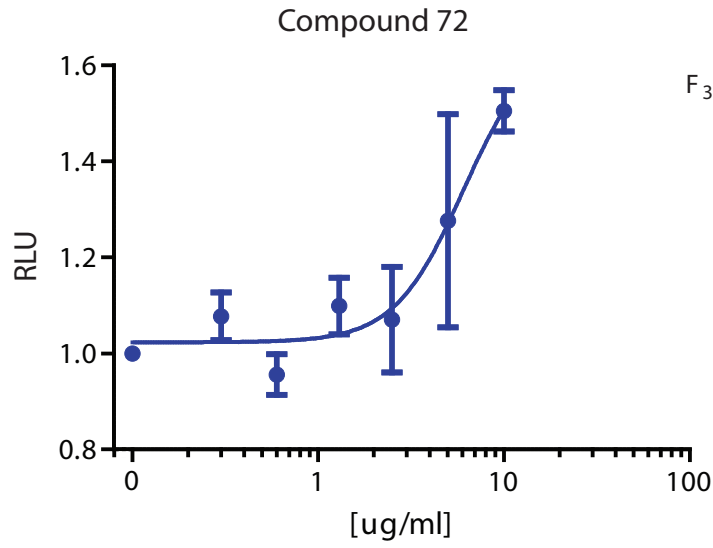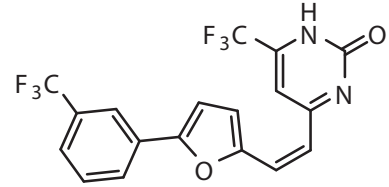

MW: 400.12

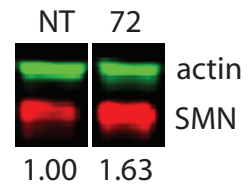

B

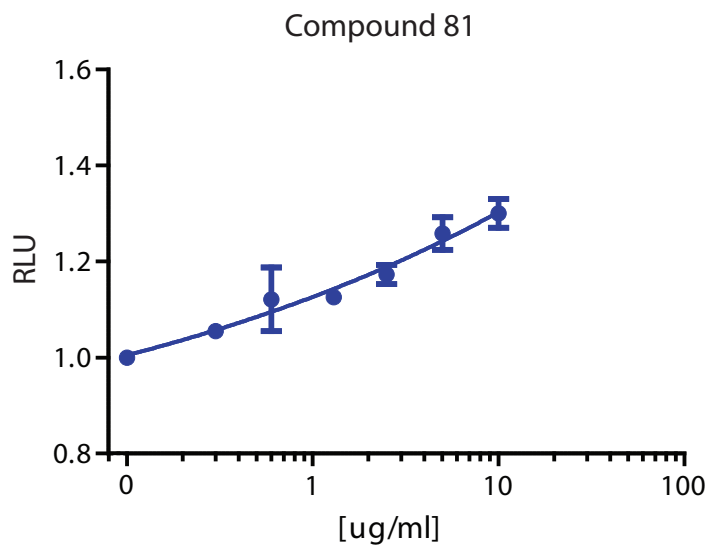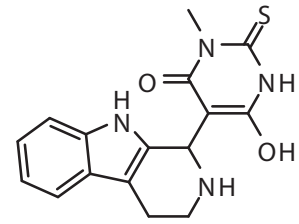

MW: 342.28

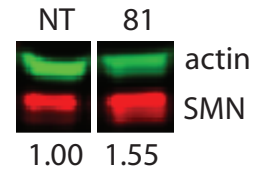

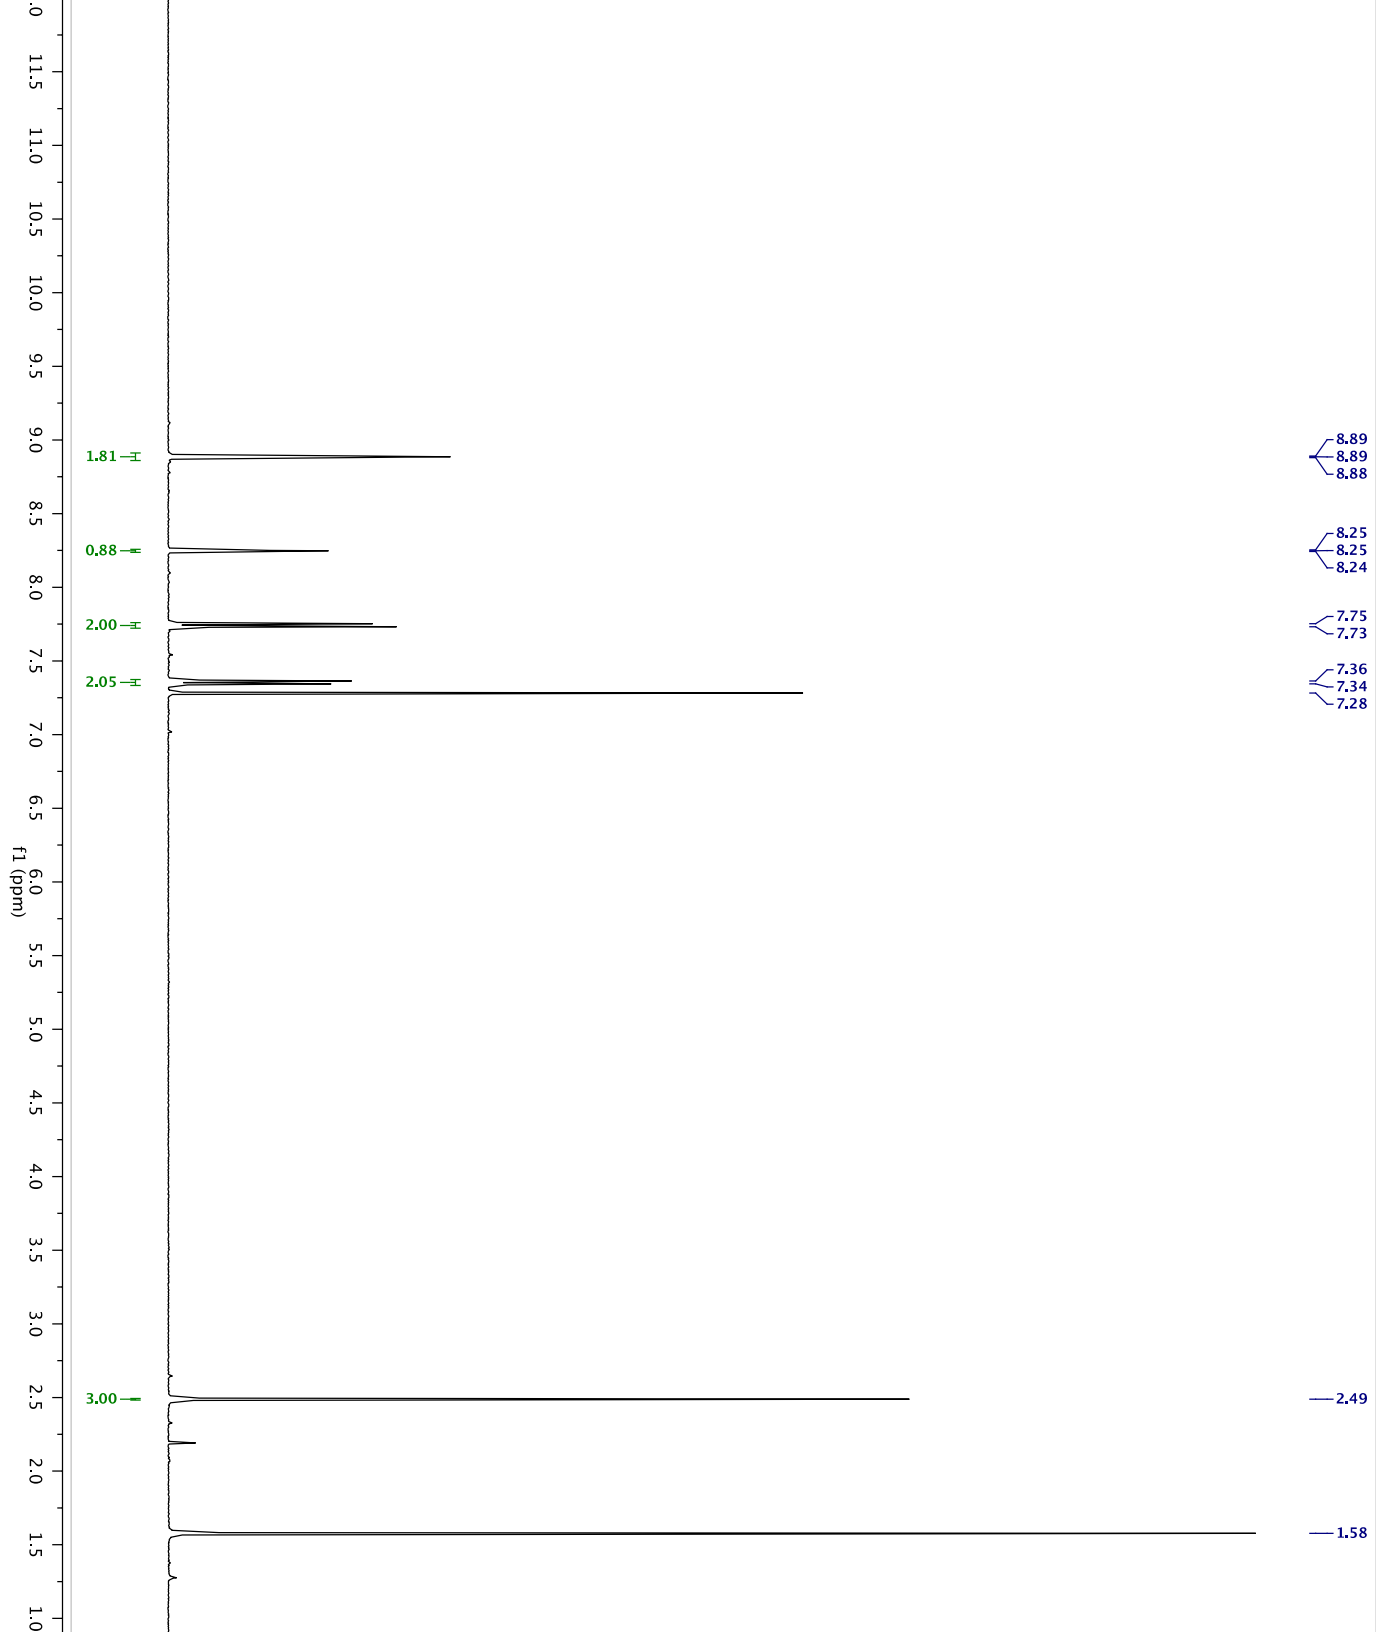

Supplement: NIHMS462506-supplement-1_si_002.pdf [file NIHMS462506-supplement-1_si_002.pdf]
